# Supplementary material for: Non-Invasive Early Detection of Oral Cancers Using Fluorescence Visualization with Optical Instruments
Source: MDPI journal article supplement (doi:10.3390/cancers12102771), 2020-09-27

# Supplementary Materials: Non-Invasive Early Detection of Oral Cancers Using Fluorescence Visualization with Optical Instruments

Takamichi Morikawa, Takahiko Shibahara, Takeshi Nomura, Akira Katakura, and Masayuki Takano

Figure S1. ROC for detection oral cancers

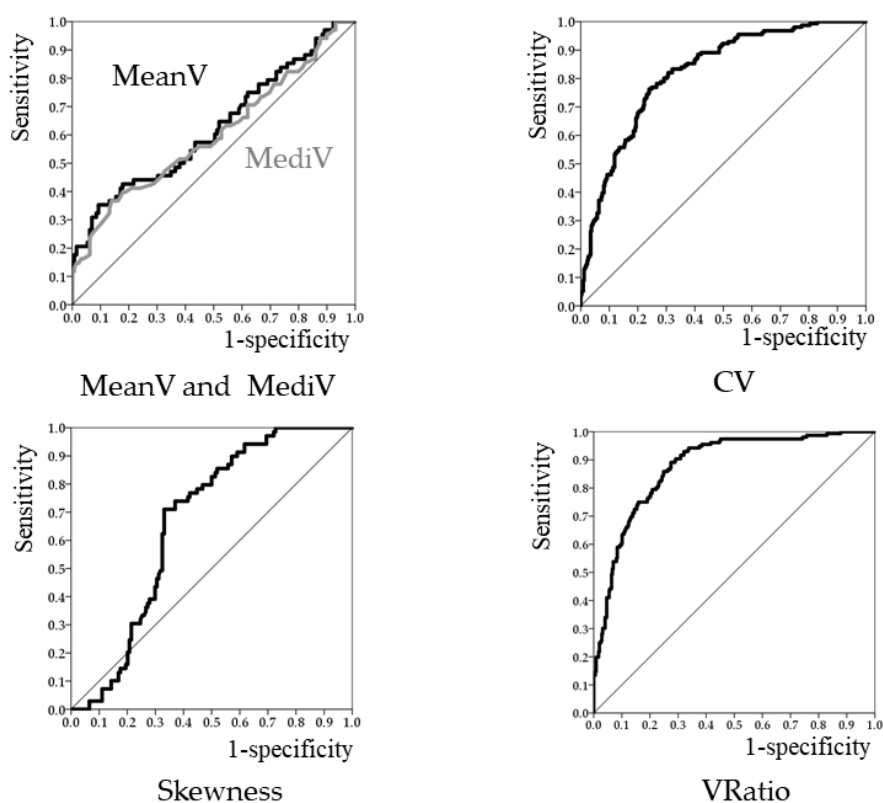

Figure 1. ROC for the detection of oral cancers.

Figure S2. Combination of each factors for detection of oral cancers

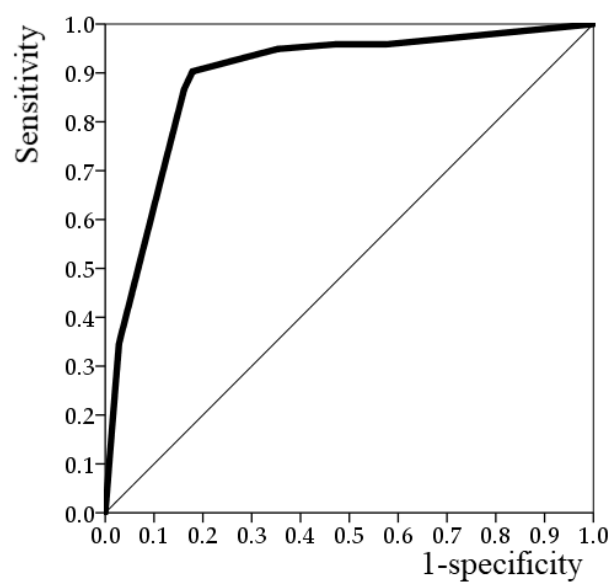

| AUC   | <i>p</i> value | Cut-off | Sensitivity | Specificity | 95% CI       |
|-------|----------------|---------|-------------|-------------|--------------|
| 0.891 | 0.066          | 19.4    | 86.6        | 84.6        | 0.861, 0.921 |

**Figure 2.** Combination of each factor for the detection of oral cancers.

Figure S3. ROC for detection OPMDs

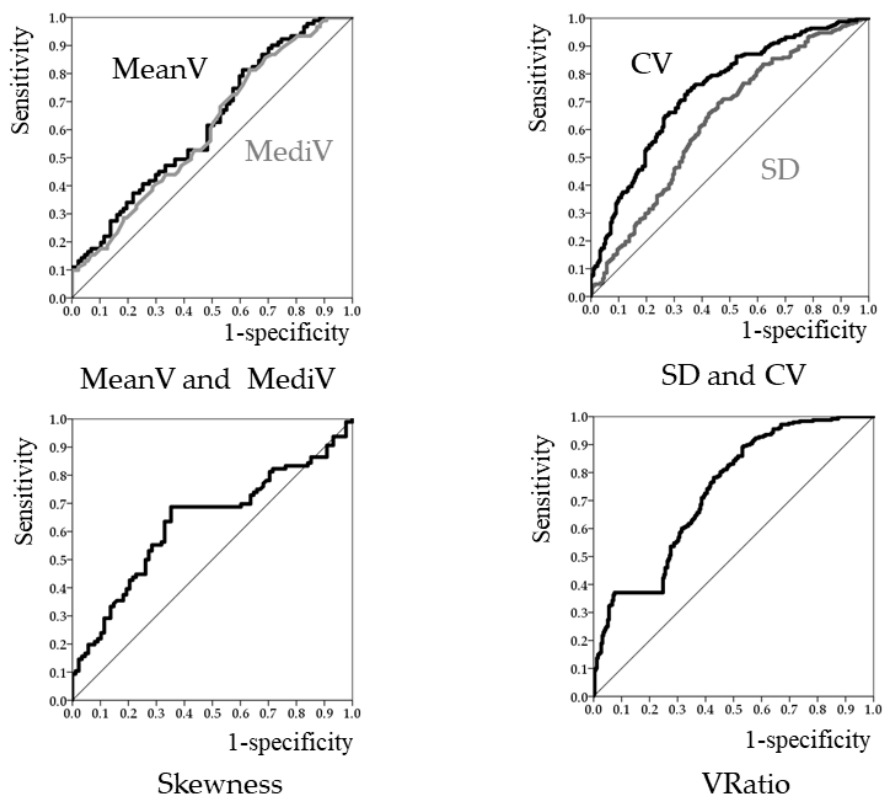

Figure 3. ROC for detection OPMDs.

**Table 1.** Patients characteristics.

| Table S1. Patients characteristics | n = 502   |
|------------------------------------|-----------|
| Sex, men/women                     | 276 / 226 |
| Age, mean                          | 62.3      |
| Site                               |           |
| Tongue                             | 259       |
| Buccal mucosa                      | 124       |
| Gingiva                            | 73        |
| Plate                              | 33        |
| Others                             | 13        |
| Condition                          |           |
| Oral squamous cell carcinoma       | 149       |
| Carcinoma in situ                  | 12        |
| Oral lichen planus                 | 123       |
| Leukoplakia                        | 102       |
| Erythroplakia                      | 3         |
| Chronic candida                    | 7         |
| Stomatitis                         | 32        |
| Benign tumor                       | 24        |
| Normal mucosa                      | 50        |
| Control site, mean                 |           |
| Area, (pixels)                     | 944       |
| MeanV                              | 81.7      |
| MediV                              | 80.2      |
| SD                                 | 2.9       |
| CV                                 | 0.04      |
| Skewness                           | 45.3      |
| kurtosis                           | -601      |
| Lesion site, mean                  |           |
| FVL rate, (%)                      | 66.7%     |
| Area, (pixels)                     | 165,057   |
| MeanV                              | 66.3      |
| MediV                              | 62.8      |
| SD                                 | 10.3      |
| CV                                 | 0.16      |
| Skewness                           | 0.56      |
| Kurtosis                           | 0.48      |
| VRatio (%)                         | 85.2%     |

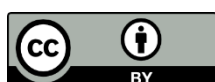

Supplement: s1 [file s1]
